# Supplementary material
Source: PubMed Central journal article supplement (PMC5860043)
Supplement: kwx095badonwebmaterialfinal.pdf [file kwx095badonwebmaterialfinal.pdf]

## Web Material

### “Healthy Lifestyle During Early Pregnancy and Risk of Gestational Diabetes Mellitus”

#### *List of Contents*

**Web Table 1.** AHEI-2010 Diet Score Components during Early Pregnancy Among Omega Study Participants ( $n = 3005$ ), Seattle, Washington, 1996–2008

**Web Table 2.** Comparison of Full Omega Cohort and Analytic Sample

**Web Table 3.** Associations of Healthy Lifestyle Components during Early Pregnancy and Risk of Gestational Diabetes Mellitus by Overweight/Obese Status Among Omega Study Participants, Seattle, Washington, 1996–2008

**Web Table 4.** Associations of Healthy Lifestyle Score during Early Pregnancy and Risk of Gestational Diabetes Mellitus by Overweight/Obese Status Among Omega Study Participants, Seattle, Washington, 1996–2008

**Web Table 1.** AHEI-2010 Diet Score Components During Early Pregnancy Among Omega Study Participants ( $n = 3005$ ), Seattle, Washington, 1996–2008

| Component                                   | Criteria for                    | Criteria for                   | Mean (SD)  | Min, Max   |
|---------------------------------------------|---------------------------------|--------------------------------|------------|------------|
|                                             | Minimum Score<br>(0)            | Maximum Score<br>(10)          |            |            |
| Vegetables, servings/day                    | 0                               | $\geq 5$                       | 4.1 (2.7)  | 0, 10      |
| Fruit, servings/day                         | 0                               | $\geq 4$                       | 5.8 (2.8)  | 0, 10      |
| Whole grains, g/day                         | 0                               | $\geq 75$                      | 0.9 (1.0)  | 0, 7.9     |
| Sugar-sweetened beverages,<br>servings/day  | $\geq 1$                        | 0                              | 7.2 (3.5)  | 0, 10      |
| Nuts, servings/day                          | 0                               | $\geq 1$                       | 2.7 (2.7)  | 0, 10      |
| Red/processed meat,<br>servings/day         | $\geq 1.5$                      | 0                              | 5.9 (2.8)  | 0, 10      |
| <i>Trans</i> -fat, % of energy              | $\geq 4$                        | $\leq 0.5$                     | 8.3 (0.9)  | 3.5, 10    |
| Long-chain (n-3) fats, mg/day               | 0                               | $\geq 250$                     | 10 (0)     | 10, 10     |
| Polyunsaturated fatty acids,<br>% of energy | $\leq 2$                        | $\geq 10$                      | 5.6 (1.9)  | 0.4, 10    |
| Sodium, mg/day                              | $\geq 4285$<br>(highest decile) | $\leq 1708$<br>(lowest decile) | 4.6 (3.2)  | 0, 10      |
| Total                                       | 0                               | 100                            | 55.2 (8.4) | 23.0, 83.5 |

Abbreviations: AHEI-2010, Alternate Healthy Eating Index 2010; SD, standard deviation.

**Web Table 2.** Comparison of Full Omega Cohort and Analytical Sample, Seattle, Washington, 1996–2008

| Characteristic                                         | Full Cohort |            | Missing Lifestyle Score<br>( <i>n</i> = 1063) |            | Analytical Sample<br>( <i>n</i> = 3005) |
|--------------------------------------------------------|-------------|------------|-----------------------------------------------|------------|-----------------------------------------|
|                                                        | No. with    | Mean (SD)  | No. with                                      | Mean (SD)  | No. (%)                                 |
|                                                        | Data        | or No. (%) | Data                                          | or No. (%) |                                         |
| Age (years), mean (SD)                                 | 4550        | 33 (4.6)   | 1062                                          | 33 (5.1)   | 33 (4.3)                                |
| Prepregnancy BMI (kg/m <sup>2</sup> ),<br>mean (SD)    | 4534        | 24 (5.0)   | 1047                                          | 25 (5.6)   | 23 (4.5)                                |
| Gestational weight gain by 20<br>weeks (kg), mean (SD) | 4334        | 4.3 (2.8)  | 931                                           | 5.0 (2.3)  | 4.5 (2.2)                               |
| Race, <i>n</i> (%)                                     | 4550        |            | 1063                                          |            |                                         |
| White                                                  |             | 3867 (85)  |                                               | 835 (79)   | 2640 (88)                               |
| Black                                                  |             | 92 (2)     |                                               | 38 (4)     | 37 (1)                                  |
| Asian                                                  |             | 347 (8)    |                                               | 103 (10)   | 205 (7)                                 |
| Other                                                  |             | 244 (5)    |                                               | 87 (8)     | 123 (4)                                 |
| High school education or more,<br><i>n</i> (%)         | 4226        | 4064 (96)  | 763                                           | 715 (94)   | 2830 (98)                               |
| Nulliparous, <i>n</i> (%)                              | 4550        | 2753 (61)  | 1060                                          | 584 (55)   | 1913 (64)                               |
| Married, <i>n</i> (%)                                  | 4553        | 4122 (91)  | 1063                                          | 919 (86)   | 2792 (93)                               |
| History of GDM, <i>n</i> (%)                           | 4281        | 70 (2)     | 985                                           | 22 (2)     | 28 (1)                                  |
| Family history of diabetes, <i>n</i> (%)               | 4550        | 684 (15)   | 1063                                          | 186 (18)   | 400 (13)                                |
| Preeclampsia, <i>n</i> (%)                             | 4504        | 127 (3)    | 1063                                          | 26 (2)     | 66 (2)                                  |
| Prepregnancy BMI category                              | 4602        |            | 1063                                          |            |                                         |
| Underweight (<18.5 kg/m <sup>2</sup> )                 |             | 83 (2)     |                                               | 18 (2)     | 55 (2)                                  |
| Normal weight (18.5-24.9<br>kg/m <sup>2</sup> )        |             | 3257 (71)  |                                               | 684 (64)   | 2259 (75)                               |

|                                                            |      |           |     |           |           |
|------------------------------------------------------------|------|-----------|-----|-----------|-----------|
| Overweight (25-29.9 kg/m <sup>2</sup> )                    |      | 769 (17)  |     | 207 (19)  | 474 (16)  |
| Obese ( $\geq$ 30 kg/m <sup>2</sup> )                      |      | 493 (11)  |     | 154 (14)  | 217 (7)   |
| Gestational age at first prenatal visit (weeks), mean (SD) | 4273 | 8.8 (2.1) | 987 | 9.4 (7.8) | 8.8 (1.9) |
| Healthy diet in early pregnancy, <i>n</i> (%)              | 4019 | 800 (20)  | 578 | 110 (19)  | 611 (20)  |
| Physically active in early pregnancy, <i>n</i> (%)         | 3534 | 2295 (65) | 283 | 149 (53)  | 1990 (66) |
| Nonsmoker during pregnancy, <i>n</i> (%)                   | 4204 | 3957 (94) | 745 | 682 (92)  | 2854 (95) |
| Low stress during early pregnancy, <i>n</i> (%)            | 4047 | 2167 (54) | 605 | 295 (49)  | 1666 (55) |

---

Abbreviations: BMI, body mass index; GDM, gestational diabetes mellitus; SD, standard deviation.

**Web Table 3.** Associations of Healthy Lifestyle Components During Early Pregnancy and Risk of Gestational Diabetes Mellitus by Overweight/Obese Status Among Omega Study Participants, Seattle, Washington, 1996–2008

| Lifestyle Component <sup>a</sup>                              | N (%) with Healthy Score | N (%) with | Unadjusted        | Model 1                  | Model 2                  |
|---------------------------------------------------------------|--------------------------|------------|-------------------|--------------------------|--------------------------|
|                                                               |                          | GDM        | RR (95% CI)       | RR <sup>b</sup> (95% CI) | RR <sup>c</sup> (95% CI) |
| Normal weight (18.5–24.9 kg/m <sup>2</sup> ) <sup>d</sup>     |                          | 75 (3)     |                   |                          |                          |
| Healthy diet                                                  | 471 (21)                 | 13 (3)     | 0.81 (0.45, 1.46) | 0.80 (0.45, 1.45)        | 0.82 (0.46, 1.47)        |
| Physically active                                             | 1526 (68)                | 49 (3)     | 0.93 (0.58, 1.48) | 1.00 (0.63, 1.58)        | 1.03 (0.64, 1.64)        |
| Nonsmoker                                                     | 2163 (96)                | 70 (3)     | 0.67 (0.28, 1.61) | 0.56 (0.23, 1.38)        | 0.61 (0.25, 1.49)        |
| Low stress                                                    | 1304 (58)                | 38 (3)     | 0.77 (0.50, 1.20) | 0.79 (0.51, 1.22)        | 0.78 (0.50, 1.21)        |
| Overweight/obese ( $\geq 25$ kg/m <sup>2</sup> ) <sup>d</sup> |                          | 63 (9)     |                   |                          |                          |
| Healthy diet                                                  | 129 (19)                 | 11 (9)     | 0.91 (0.49, 1.69) | 0.86 (0.46, 1.61)        | 0.90 (0.48, 1.67)        |
| Physically active                                             | 432 (63)                 | 36 (8)     | 0.81 (0.50, 1.32) | 0.83 (0.52, 1.33)        | 0.84 (0.53, 1.34)        |
| Nonsmoker                                                     | 639 (92)                 | 58 (9)     | 1.01 (0.43, 2.39) | 0.80 (0.34, 1.92)        | 0.73 (0.31, 1.71)        |
| Low stress                                                    | 332 (48)                 | 26 (8)     | 0.77 (0.48, 1.24) | 0.83 (0.51, 1.33)        | 0.81 (0.50, 1.31)        |

Abbreviations: CI, confidence interval; AHEI-2010, Alternate Healthy Eating Index 2010; RR, relative risk.

<sup>a</sup> Criteria for healthy score: AHEI-2010 diet score  $\geq 62$  (healthy diet),  $\geq 150$  minutes/week of moderate/vigorous leisure time physical activity (physically active), never smoker or quit before pregnancy (nonsmoker), and Perceived Stress Scale score  $\leq 3$  (low stress).

<sup>b</sup> Model 1 adjusted for maternal age, race (white/other), nulliparity (yes/no), and all lifestyle components listed.

<sup>c</sup> Model 2 adjusted for all covariates in model 1 and prepregnancy body mass index.

---

<sup>d</sup> Adjusted *P* values for interaction: model 1 (diet = 0.76, physical activity = 0.59, nonsmoking = 0.50, stress = 0.92), model 2 (diet = 0.66, physical activity = 0.60, nonsmoking = 0.61, stress = 0.97).

**Web Table 4.** Associations of Healthy Lifestyle Score during Early Pregnancy and Risk of Gestational Diabetes Mellitus by Overweight/Obese Status Among Omega Study Participants, Seattle, Washington, 1996–2008

| Lifestyle Score                     | Normal Weight ( <i>n</i> = 2259) <sup>a,b</sup> |                          |                          | Overweight/Obese ( <i>n</i> = 691) <sup>a,b</sup> |                          |                          |
|-------------------------------------|-------------------------------------------------|--------------------------|--------------------------|---------------------------------------------------|--------------------------|--------------------------|
|                                     | No. (%)                                         | Model 1                  | Model 2                  | No. (%)                                           | Model 1                  | Model 2                  |
|                                     | with GDM                                        | RR <sup>c</sup> (95% CI) | RR <sup>d</sup> (95% CI) | with GDM                                          | RR <sup>c</sup> (95% CI) | RR <sup>d</sup> (95% CI) |
| Linear score                        | 75 (3)                                          | 0.83 (0.63, 1.09)        | 0.84 (0.65, 1.11)        | 63 (9)                                            | 0.83 (0.63, 1.10)        | 0.83 (0.63, 1.10)        |
| No. of healthy lifestyle components |                                                 |                          |                          |                                                   |                          |                          |
| 0                                   | 1 (4)                                           | 1.73 (0.22, 13.91)       | 1.56 (0.20, 11.84)       | 3 (19)                                            | 10.21 (1.04, 100.07)     | 10.78 (1.11, 104.75)     |
| 1                                   | 15 (5)                                          | 1.59 (0.63, 4.01)        | 1.49 (0.59, 3.75)        | 13 (11)                                           | 3.97 (0.51, 30.69)       | 4.02 (0.52, 31.28)       |
| 2                                   | 28 (3)                                          | 1.02 (0.43, 2.45)        | 0.97 (0.41, 2.33)        | 24 (8)                                            | 3.13 (0.42, 23.58)       | 3.19 (0.42, 24.19)       |
| 3                                   | 25 (3)                                          | 0.92 (0.38, 2.24)        | 0.89 (0.37, 2.15)        | 22 (10)                                           | 3.81 (0.5, 28.74)        | 3.88 (0.51, 29.39)       |
| 4                                   | 6 (3)                                           | Reference                | Reference                | 1 (3)                                             | Reference                | Reference                |
| <i>P</i> for trend                  |                                                 | 0.18                     | 0.22                     |                                                   | 0.20                     | 0.19                     |
| 3 or less                           | 69 (3)                                          | Reference                | Reference                | 62 (9)                                            | Reference                | Reference                |
| 4                                   | 6 (3)                                           | 0.94 (0.41, 2.16)        | 0.99 (0.43, 2.26)        | 1 (3)                                             | 0.28 (0.04, 2.02)        | 0.27 (0.04, 1.99)        |
| 2 or less                           | 44 (4)                                          | Reference                | Reference                | 40 (9)                                            | Reference                | Reference                |
| 3 or more                           | 31 (3)                                          | 0.80 (0.51, 1.25)        | 0.82 (0.52, 1.28)        | 23 (9)                                            | 0.95 (0.58, 1.56)        | 0.95 (0.58, 1.56)        |

Abbreviations: CI, confidence interval; RR, relative risk.

---

<sup>a</sup> Model 1 *P* for interaction: linear = 0.94, categorical = 0.89, 4 vs. 3 or less healthy behaviors = 0.27, 3 or more vs. 2 or less healthy behaviors = 0.52.

<sup>b</sup> Model 2 *P* for interaction: linear = 0.96, categorical = 0.91, 4 vs. 3 or less healthy behaviors = 0.27, 3 or more vs. 2 or less healthy behaviors = 0.51.

<sup>c</sup> Model 1 adjusted for maternal age, race (white/other), and nulliparity (yes/no).

<sup>d</sup> Model 2 adjusted for all covariates in model 1 and prepregnancy body mass index.
